# Supplementary material
Source: publisher figshare collection journal article supplement (https://acs.figshare.com/ndownloader/files/34458477)
Supplement: Supplementary file 1 [file 34458477]

## **Supporting Information**

### **CoFe<sub>2</sub>O<sub>4</sub> Hollow Spheres Decorated Three-Dimensional rGO Sponge for Highly Efficient Electrochemical Charge Storage Device**

*Debika Gogoi,<sup>a</sup> Manash R. Das,<sup>bc</sup> Narendra Nath Ghosh<sup>a\*</sup>*

<sup>a</sup> Nano-materials Lab, Department of Chemistry, Birla Institute of Technology and Science, Pilani K K Birla Goa Campus, Zuarinagar 403726, Goa, India.

<sup>b</sup> Advanced Materials Group, Materials Sciences and Technology Division, CSIR-North East Institute of Science and Technology, Jorhat 785006, Assam, India.

<sup>c</sup> Academy of Scientific and Innovative Research (AcSIR), Ghaziabad 201002, India.

\*Corresponding author. Tel. /fax: +91 832 2580318/25570339.

\*E-mail address: naren70@yahoo.com (N. N. Ghosh)

Author's email addresses: [p20180429@goa.bits-pilani.ac.in](mailto:p20180429@goa.bits-pilani.ac.in) (Debika Gogoi),  
[mnshrdas@yahoo.com](mailto:mnshrdas@yahoo.com) (Manash R. Das)

## **S1. Materials Synthesis**

**S1.1. Chemicals used.** Cobalt chloride hexahydrate ( $\text{CoCl}_2 \cdot 6\text{H}_2\text{O}$ ), Ferric chloride hexahydrate ( $\text{FeCl}_3 \cdot 6\text{H}_2\text{O}$ ), and ethylene glycol were purchased from Merck, India. Polyethylene glycol (PEG-2000), Sodium hydroxide (NaOH), Hydrazine hydrate, Sulphuric acid ( $\text{H}_2\text{SO}_4$ ), Potassium Hydroxide (KOH), Methanol (HPLC grade) and ethanol were purchased from Fisher Scientific. Graphite powder (mean particle size of  $<20$  mm), Polyvinylidene difluoride (PVDF), acetylene black, N-methyl-2-pyrrolidinone (NMP) and polyvinyl alcohol (PVA) were purchased from Sigma-Aldrich. All the chemicals were used without further purification. Deionized water was used throughout the experiment.

### **S1.2. Synthesis of Graphene oxide (GO)**

GO was synthesized by using modified Hummer's method. In the standard synthetic process, 0.6 g  $\text{NaNO}_3$  was added to 35 mL conc.  $\text{H}_2\text{SO}_4$  taken in a beaker kept inside an ice-bath. Then 1.3 g of graphite powders were added to the mixture and stirred for 8 h by maintaining the temperature below  $5^\circ\text{C}$ . To this mixture, 3.8 g of  $\text{KMnO}_4$  was added slowly and the temperature of the mixture was raised to  $\sim 35^\circ\text{C}$  and stirred for 8-10 h. Then 180 mL of distilled water was added to the mixture and the temperature was raised to  $98^\circ\text{C}$  and maintained for  $\sim 1$  h. After that 2 mL of 30%  $\text{H}_2\text{O}_2$  solution was added to the mixture and stirred for 1 h. The obtained product (GO) was washed with 10% HCl solution, distilled water and ethanol and then dried at  $60^\circ\text{C}$  for 10 h.

### **S1.3. Synthesis of reduced graphene oxide (rGO) with nanosheet-like structure**

1 g of GO was dispersed in 200 mL distilled water and then 2 M NaOH was added drop by drop to this mixture till pH reaches  $\sim 12$ . The mixture was stirred for  $\sim 30$  min and then 56 mL of hydrazine hydrate was added and refluxed for 4 h. The black ppt. obtained was washed with distilled water till pH of the mixture reaches  $\sim 7$  followed by washing with ethanol and finally dried at  $60^\circ\text{C}$  for 10 h.

### **S1.4. Preparation of GO sponge ( $\text{GO}_{\text{sp}}$ ) and rGO sponge ( $\text{rGO}_{\text{sp}}$ )**

In a beaker, GO was well-dispersed in minimum amount of water and then kept in  $-80^\circ\text{C}$  for overnight followed by lyophilisation for 72 h. The obtained GO sponge was kept in vacuum oven at  $60^\circ\text{C}$  for 10h. The prepared  $\text{GO}_{\text{sp}}$  was placed in an alumina crucible and 6

mL hydrazine hydrate and then the crucible was covered with a lid. Then it was heated for 3 h at 150°C to obtain rGO<sub>sp</sub>.

### **S1.5. Synthesis of CoFe<sub>2</sub>O<sub>4</sub> hollow spheres (CF<sub>hs</sub>)**

In a beaker CoCl<sub>2</sub>.6H<sub>2</sub>O and FeCl<sub>3</sub>.6H<sub>2</sub>O (molar ratio=1:2) were dissolved in 80 ml of ethylene glycol. To this mixture sodium acetate and poly ethylene glycol-2000 (PEG-2000) (weight ratio 1:3.6) were added and then stirred vigorously until NaAc and PEG-2000 gets completely dissolved. The mixture was then transferred to a stainless steel autoclave and heated at 200°C for 22 h. The obtained ppt. was separated from the reaction mixture by using an external magnet followed by washing with distilled water and ethanol and then dried at 60°C for 10 h.

### **S1.6. Synthesis of CF<sub>hs</sub>-rGO<sub>sp</sub> nanocomposites**

CF<sub>hs</sub>-rGO<sub>sp</sub> nanocomposites were prepared by employing a simple wet-impregnation method. In a round bottom flask, desired amount of CF<sub>hs</sub> and rGO<sub>sp</sub> were dispersed in methanol and the refluxed for 3 h and then the obtained product was separated from the solvent by using an external magnet and then dried at 60°C for 10 h, for further use.

**S2. Characterization and Instrumentation.** For this work, we have used an Alpha 1-2 LD plus freeze dryer (Martin Christ, Germany) to prepare the GO sponge. Then, characterization of the synthesized materials were carried out by using the following characterization techniques: (i) X-ray diffraction (XRD) patterns were recorded using a powder X-ray diffractometer (Mini Flex II, Rigaku, Japan) with Cu K $\alpha$  ( $\lambda$  = 0.15405 nm) radiation at a scanning speed of 3 ° min<sup>-1</sup>, (ii) Field emission scanning electron microscopy (FESEM) images of samples were obtained using Quanta 250 FEG (FEI), (iii) High-resolution transmission electron microscopy (HRTEM) and selected area electron diffraction (SAED) images were obtained by JEM-2100 (JEOL), 200 kV equipped with LaB<sub>6</sub> filament, (iv) Energy dispersive X-ray spectra (EDS) and elemental mapping of the synthesized material was obtained from X-Max (Oxford Instruments) attached to a JEOL JEM 2100 TEM operated at 200 kV, (v) Fourier Transform Infrared spectra (FTIR) were recorded using Spectrum two FT-IR spectrometer (Perkin Elmer), (vi) Raman spectra were recorded on a Horiba via Raman microscope with a 633 nm laser excitation, (vii) XPS measurements were carried out by using a Thermo-Scientific ESCALAB Xi<sup>+</sup> spectrometer having a monochromatic Al K $\alpha$  X-ray source (1486.6 eV) and a spherical energy analyzer that

operates in the CAE (constant analyzer energy) mode. (vii) Multiple point BET surface area was determined by a Surface area and porosimetry analyzer (Micromeritics Tristar 3000, USA).

IVIUMSTAT (10V/5A/8MHz) workstation was used to perform the electrochemical studies.

### **S3. Electrode preparation:**

To fabricate the working electrode, first, a viscous paste of 80 wt % active electrode material with 10 wt % poly(vinylidene fluoride) in N-methyl-2-pyrrolidinone and 10 wt % acetylene black was prepared and then this paste was coated on the nickel foam with dimensions (1.5 cm × 1.5 cm) and dried at 80 °C for 24 h under vacuum to remove the residual solvent. Mass loading on the Ni foam was ~2 mg.

Only one side of the Ni foam was coated in case of the working electrode for asymmetric cell.

### **S4. Fabrication of an asymmetric supercapacitor (ASC) cell.**

The voltammetric charges (Q) were calculated based on the following equations:

$$Q = C_{\text{single}} \times \Delta V \times m \quad (\text{S1})$$

where m is the mass of the electrode (g),  $\Delta V$  is the potential window (V), and  $C_{\text{single}}$  is the specific capacitance ( $\text{F g}^{-1}$ ) of each electrode measured in three-electrode setup (calculated from cyclic voltammograms at a scan rate of  $10 \text{ mV s}^{-1}$ ).

Considering the charge/mass ratio for both anode and cathode, balancing of charge was carried out by substituting above equation as:

$$\frac{q_+}{q_-} = \frac{m_+}{m_-} = \frac{C_{\text{sp}}^- \times \Delta V^-}{C_{\text{sp}}^+ \times \Delta V^+} \quad (\text{S2})$$

Where  $C_{\text{sp}}^-$  is the  $C_s$  value obtained for the anode material in the potential window  $\Delta V^-$ ,  $C_{\text{sp}}^+$  is the  $C_s$  value obtained for the cathode material in the potential window  $\Delta V^+$ .

### **S5. Fabrication of the flexible supercapacitor device.**

30 mL distilled water was taken in a beaker and heated on a hotplate. 1.6 g KOH was added to the boiling water followed by the addition of 0.42 g  $\text{K}_4[\text{Fe}(\text{CN})_6]$ . Then 3.2 g of PVA was

added gradually to the reaction mixture and stirred till a thick gel was formed. This gel was then pasted between the positive and negative electrode and allowed to cool and dried at room temperature for overnight.

#### S6. Equations used:

The values of specific capacitance ( $C_s$ ) for the three-electrode cell and the two-electrode asymmetric cells were calculated by using the following equation:

$$C_s = \frac{i\Delta t}{m\Delta V} \quad (S3)$$

Where,  $i$  represents the charge or discharge current in Ampere (A),  $\Delta t$  is the discharge time in seconds (s),  $m$  represents the mass of supercapacitive material in gram (g) and  $\Delta V$  is the applied potential window.

For the two-electrode asymmetric cell, the energy density ( $E$ ), the power density ( $P$ ), and the Coulombic efficiency ( $\eta$ ) were determined by using the following equations:

$$E = \frac{C_s \times (\Delta V)^2}{2} \quad (S4)$$

$$P = \frac{E}{\Delta t} \quad (S5)$$

$$\eta(\%) = t_d/t_c \times 100 \quad (S6)$$

where,  $t_d$  is the discharging time,  $t_c$  is the charging time.

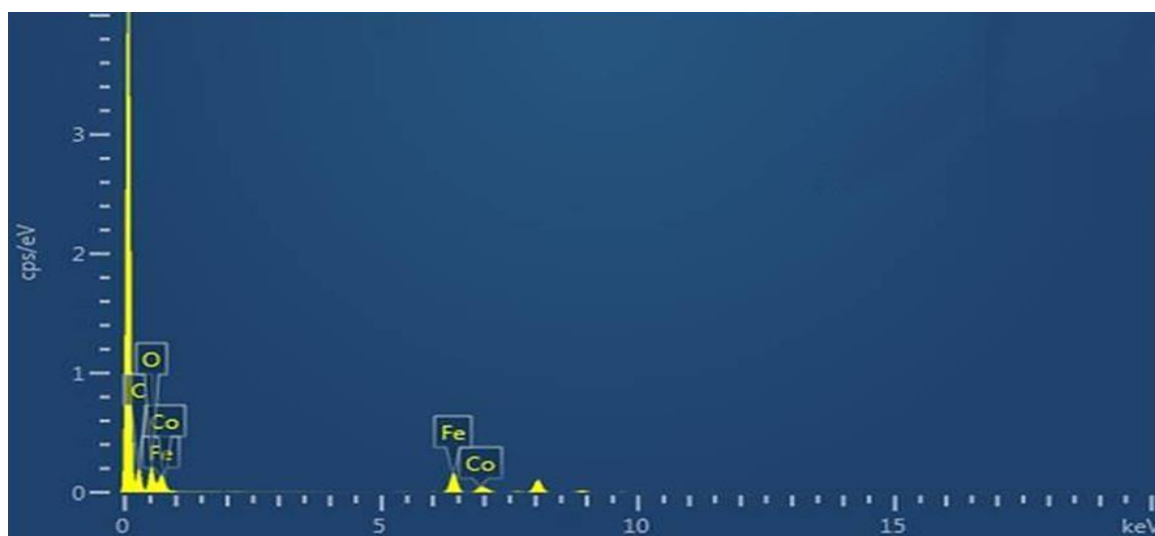

**Figure S1.** EDS spectra of 80CF<sub>hs</sub>-20rGO<sub>sp</sub>

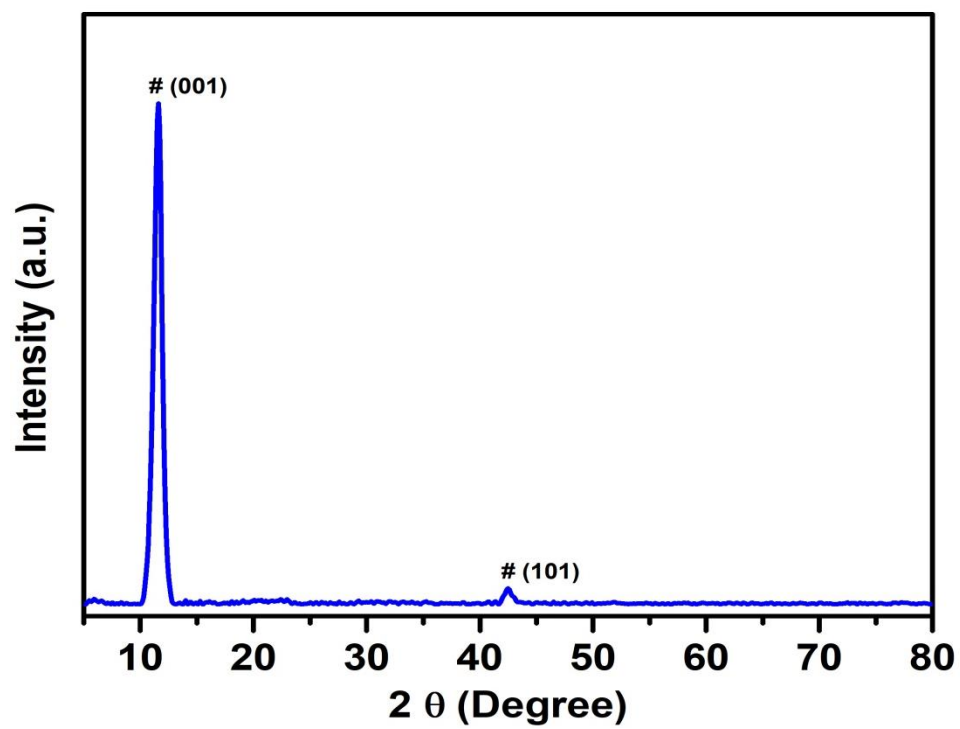

Figure S2. XRD of Graphene oxide (GO)

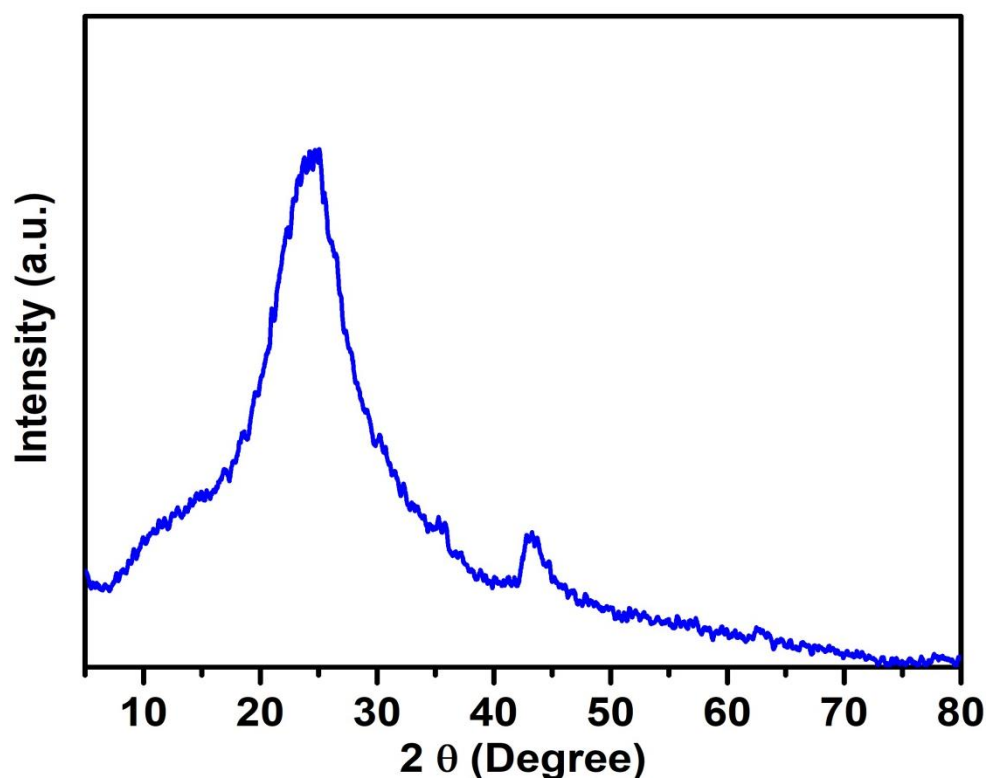

Figure S3. XRD of rGO nanosheets

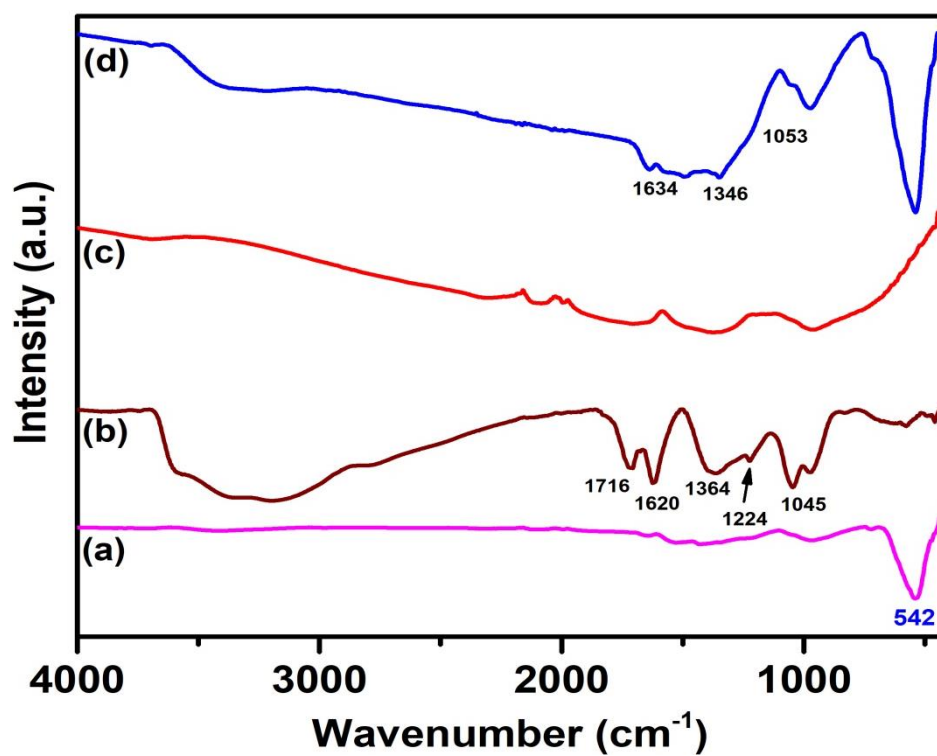

**Figure S4.** FTIR spectra of (a) CF<sub>hs</sub>, (b) GO<sub>sp</sub>, (c) rGO<sub>sp</sub>, and (d) 80CF<sub>hs</sub>-20rGO<sub>sp</sub>

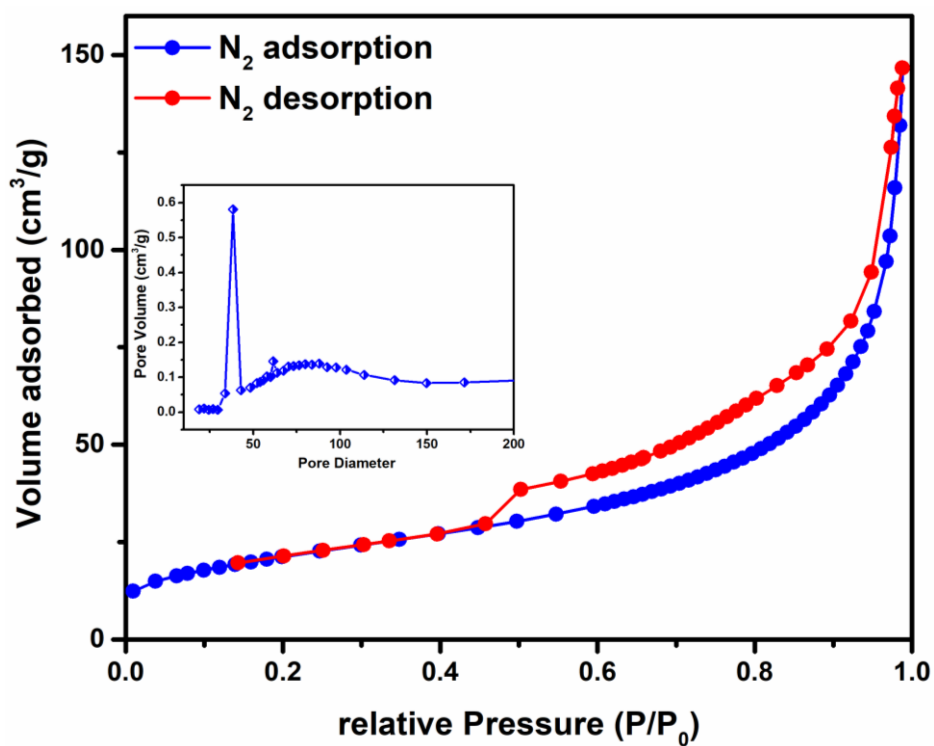

**Figure S5.** N<sub>2</sub> adsorption-desorption isotherm, inset: pore size distribution of 80CF<sub>hs</sub>-20rGO<sub>sp</sub> nanocomposite.

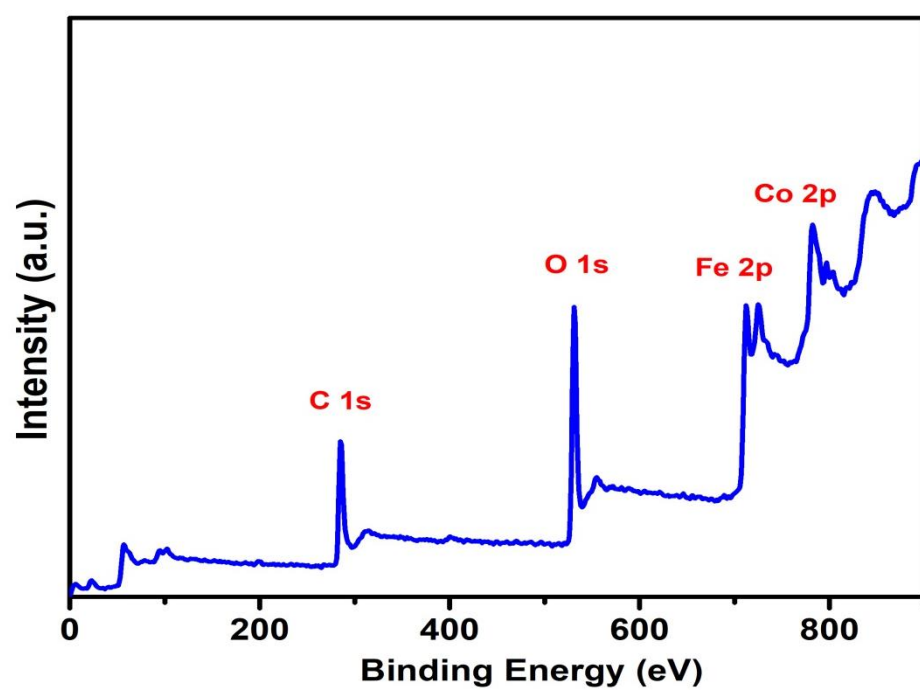

**Figure S6.** XPS survey spectrum of 80CF<sub>hs</sub>-20rGO<sub>sp</sub>



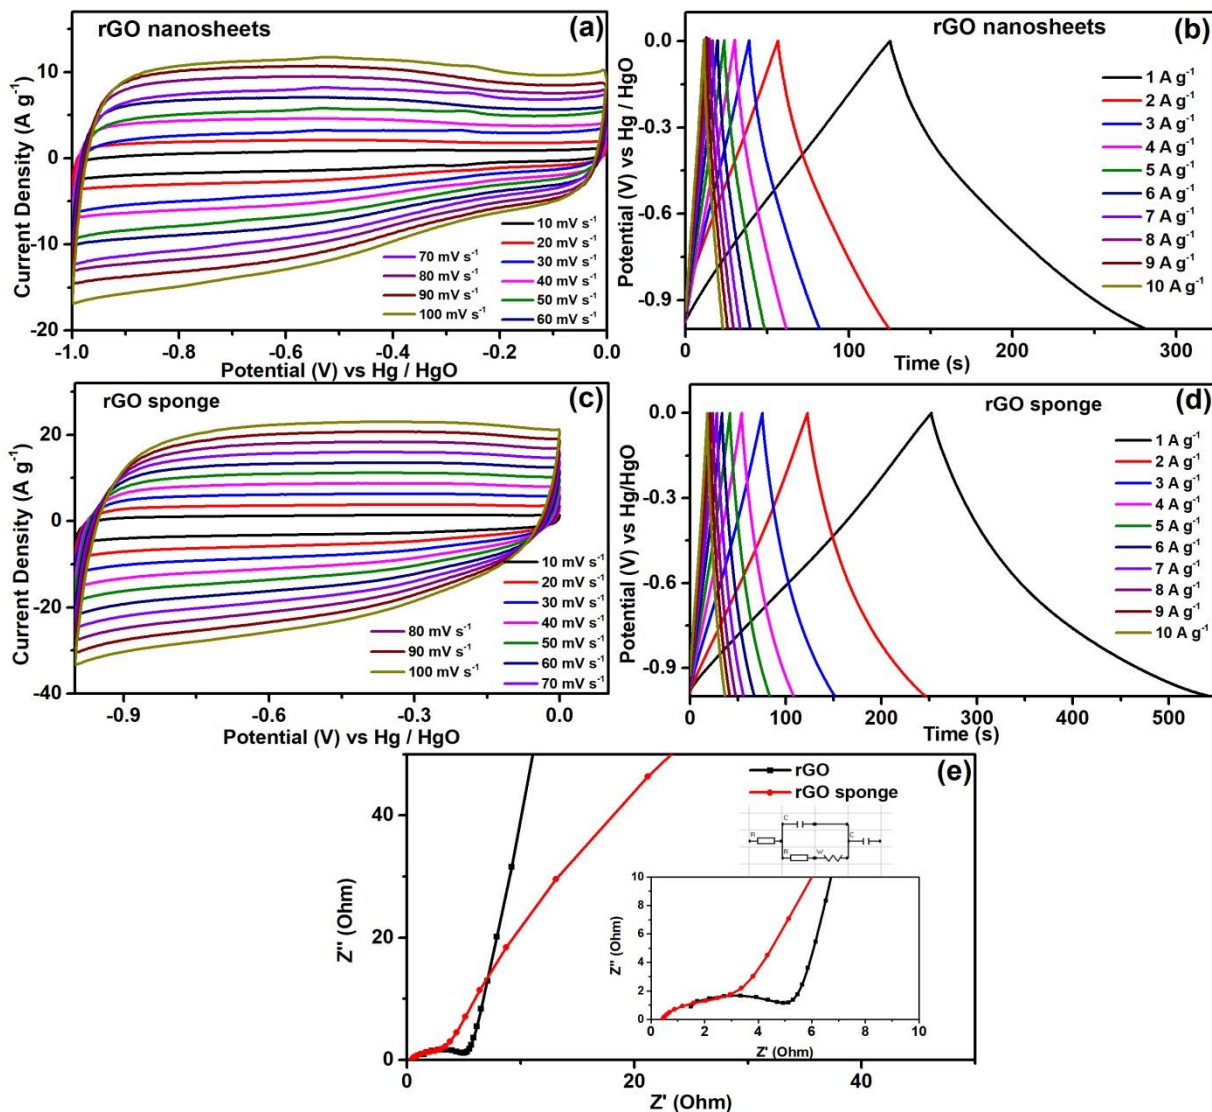

**Figure S7.** CV profiles at various scan rates and GCD curves at various current densities of (a), (b) rGO nanosheet; (c), (d) rGO sponge; and (e) Nyquist plots of rGO nanosheets and rGO sponge, inset shows the equivalent circuit used for fitting the Nyquist plots and the EIS curves at high frequency region.

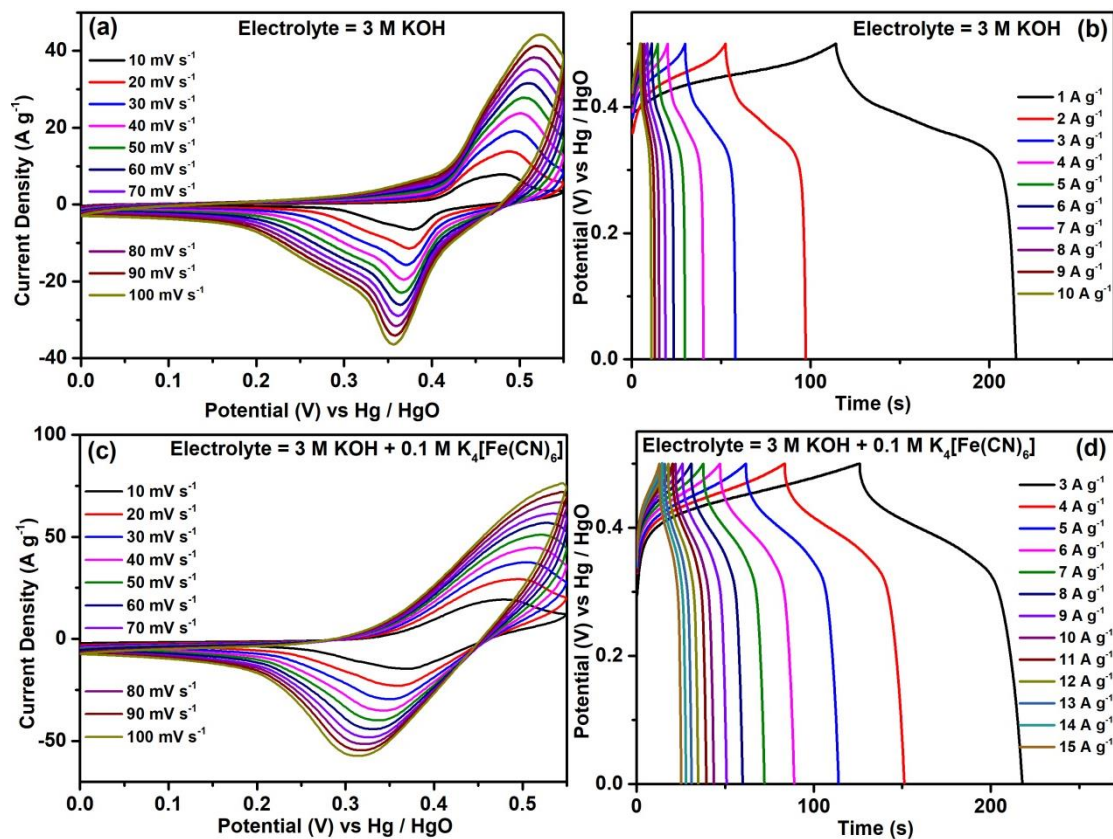

**Figure S8.** CV profiles at various scan rates and GCD curves at various current densities of  $\text{CF}_{\text{hs}}$  in (a), (b) 3 M KOH electrolyte; (c), (d) 3 M KOH + 0.1 M  $\text{K}_4[\text{Fe}(\text{CN})_6]$  electrolyte.

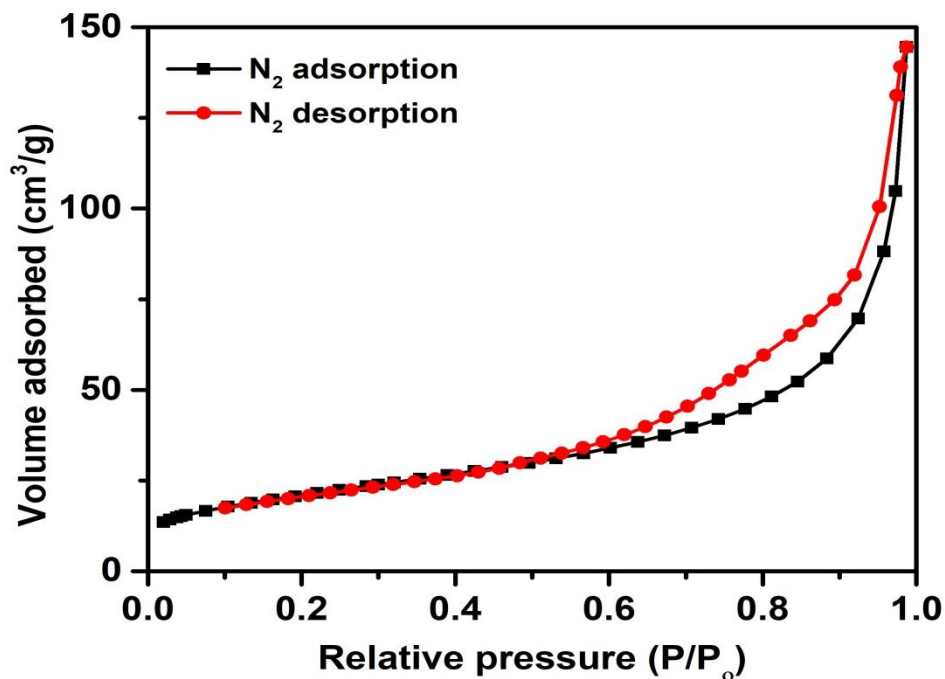

**Figure S9.**  $\text{N}_2$  adsorption-desorption isotherm of  $\text{CF}_{\text{hs}}$ .

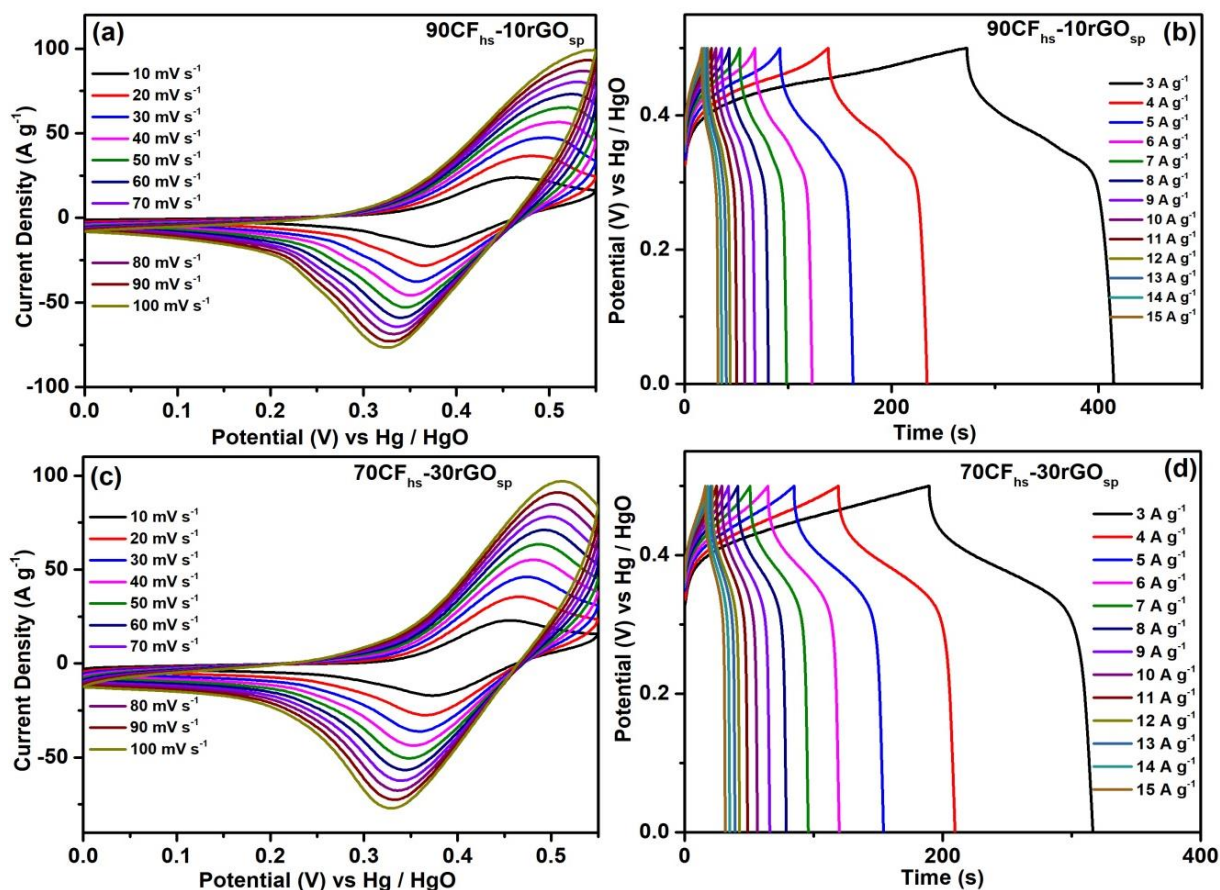

**Figure S10.** CV curves at different scan rates and GCD curves at different current densities of (a), (b) 90CF<sub>hs</sub>-10rGO<sub>sp</sub>, and (c), (d) 70CF<sub>hs</sub>-30rGO<sub>sp</sub>.

**Table S1.** Obtained EIS data of the electrode materials after circuit fitting

| S. No. | Material                                      | Equivalent Series Resistance ( $R_1=R_s$ ) $\Omega$ | Charge Transfer Resistance ( $R_2=R_{CT}$ ) $\Omega$ | Warburg Resistance (W) $\Omega$ | $C_1=C_{DL}$ (F) | $C_2=C_L$ (F) |
|--------|-----------------------------------------------|-----------------------------------------------------|------------------------------------------------------|---------------------------------|------------------|---------------|
| 1      | Pure CF<br>(in 3 M KOH)                       | 0.45                                                | 19.3                                                 | 1.66E-03                        | 3.03E-03         | 8.34E+00      |
| 2      | Pure CF<br>(in 3M KOH+ 0.1M $K_4[Fe(CN)_6]$ ) | 0.44                                                | 9.2                                                  | 1.69E-03                        | 3.04E-03         | 1.00E+01      |
| 3      | Pure rGO                                      | 1.39                                                | 3.68                                                 | 6.52E-01                        | 2.22E-03         | 1.91E-01      |
| 4      | rGO sponge                                    | 0.68                                                | 2.33                                                 | 2.34E-02                        | 1.76E-01         | 3.30E-01      |
| 5      | 90CF-10rGO sponge                             | 0.38                                                | 0.53                                                 | 4.34E-02                        | 9.38E-04         | 7.01E-02      |
| 6      | 80CF-20rGO sponge                             | 0.37                                                | 0.38                                                 | 1.18E-02                        | 1.92E-02         | 3.89E-01      |
| 7      | 70CF-30rGO sponge                             | 0.47                                                | 0.77                                                 | 3.79E-02                        | 9.52E-04         | 4.29E-01      |

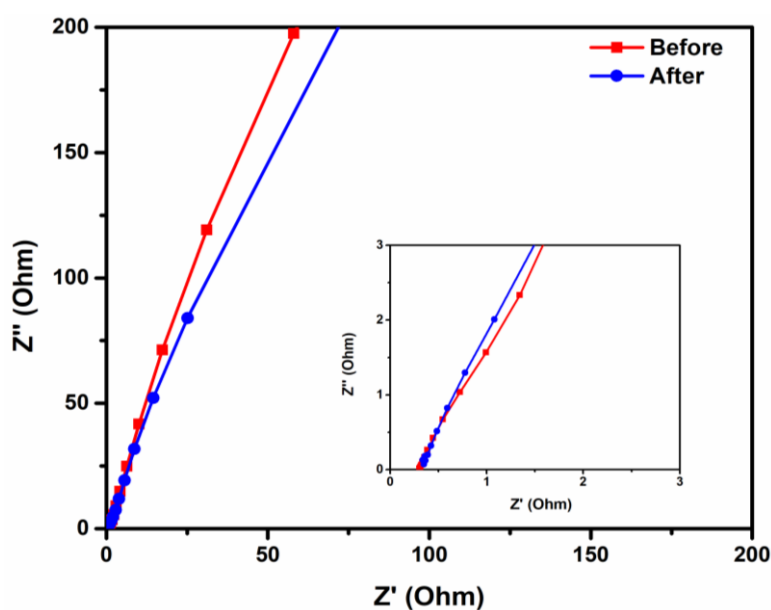

**Figure S11.** Nyquist plot of 80CF<sub>hs</sub>-20rGO<sub>sp</sub> before and after ~5000 GCD cycles.

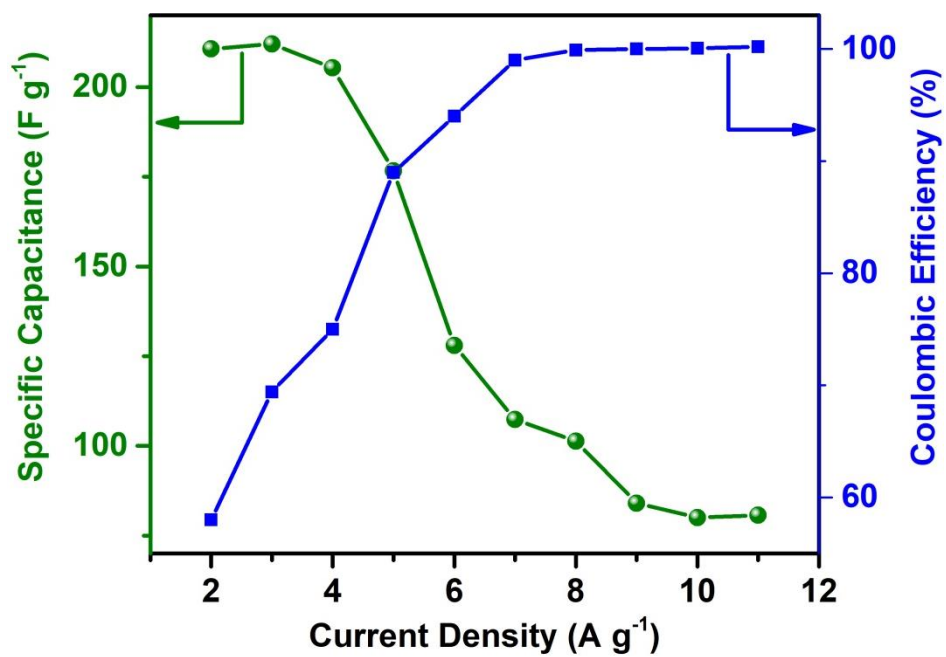

**Figure S12.** Variation of specific capacitance and Coulombic efficiency with current density.

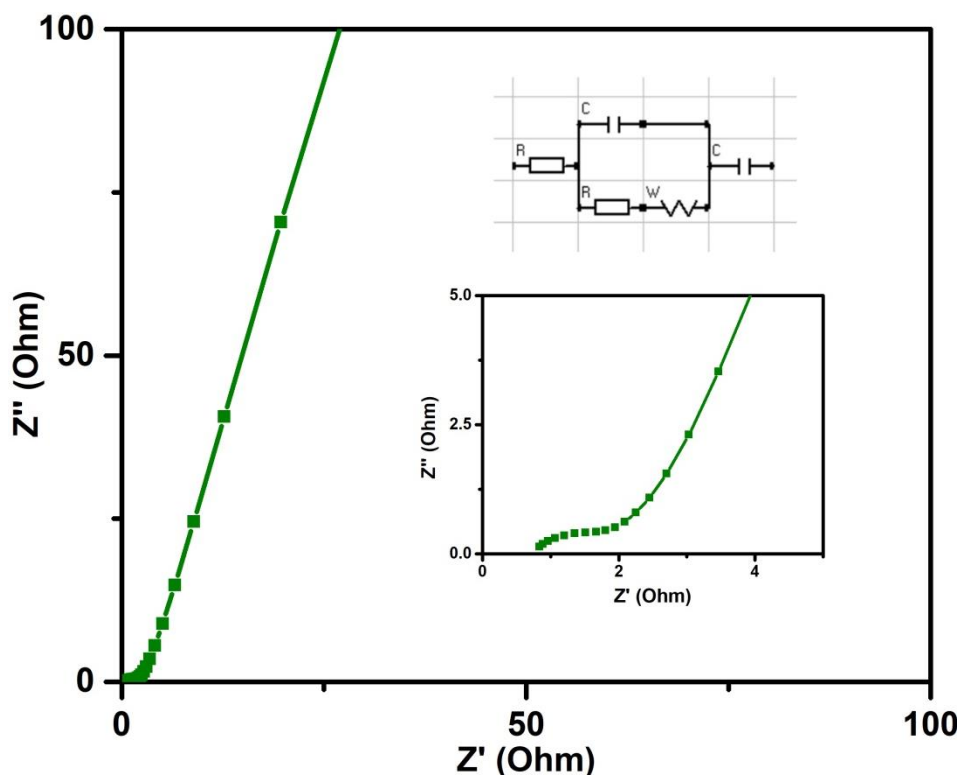

**Figure S13.** Nyquist plot of the fabricated all-solid-state flexible supercapacitor device.



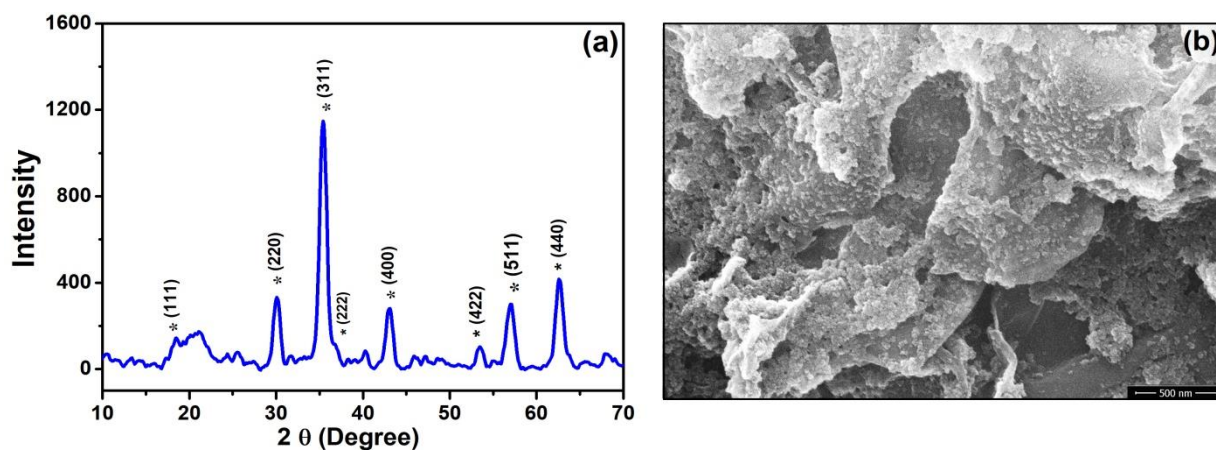

**Figure S14.** (a) XRD patterns (b) FESEM micrograph of used 80CF<sub>hs</sub>-20rGO<sub>sp</sub> nanocomposite.

**Table S2.** Comparison table of the fabricated flexible ASC device (this work) with some of the already reported carbon-based two-electrode asymmetric supercapacitors.

| S. No. | Material                                                                    | Electrolyte                           | Working Potential (V) | Power Density (W kg <sup>-1</sup> ) | Energy Density (W h kg <sup>-1</sup> ) | Retention          | Ref. |
|--------|-----------------------------------------------------------------------------|---------------------------------------|-----------------------|-------------------------------------|----------------------------------------|--------------------|------|
| 1.     | CoFe <sub>2</sub> O <sub>4</sub> /rGO   rGO hydrogel                        | 6 M KOH                               | 0-1.3                 | 650                                 | 17.84                                  | 87% (4000 cycles)  | 1    |
| 2.     | CoFe <sub>2</sub> O <sub>4</sub>   graphene                                 | 1 M KOH                               | 0-1.5                 | 643                                 | 12.14                                  | 67% (3000 cycles)  | 2    |
| 3.     | CoFe <sub>2</sub> O <sub>4</sub> /rGO   Fe <sub>3</sub> O <sub>4</sub> /rGO | 1 M KOH                               | 0-1.7                 | 840                                 | 45.5                                   | 91% (5000 cycles)  | 3    |
| 4.     | Co <sub>1-x</sub> S/CoFe <sub>2</sub> O <sub>4</sub> @rGO  AC               | 2 M KOH                               | 0-1.4                 | 700                                 | 61.5                                   | 84% (10000 cycles) | 4    |
| 5.     | NS/CoFe <sub>2</sub> O <sub>4</sub> /C oOOH  rGO/PE DOT:PSS                 | 3 M KOH                               | 0-1.6                 | 374.9                               | 54.1                                   | -                  | 5    |
| 6.     | Carbon spheres/MnO <sub>2</sub>    Carbon spheres                           | 0.1 M Na <sub>2</sub> SO <sub>4</sub> | 0-2                   | 100                                 | 22.1                                   | 99% (1000 cycles)  | 6    |

|     |                                                 |                                                                  |        |       |                |                         |    |
|-----|-------------------------------------------------|------------------------------------------------------------------|--------|-------|----------------|-------------------------|----|
| 7.  | NiS  CNFs                                       | 2 M KOH                                                          | 0-1.55 | 387.5 | 34.9           | 90.2%<br>(3000 cycles)  | 7  |
| 8.  | Co <sub>3</sub> O <sub>4</sub> NSs-rGO<br>   AC | 2 M KOH                                                          | 0-1.45 | 2166  | 13.4           | 89%<br>(1000 cycles)    | 8  |
| 9.  | Co <sub>3</sub> O <sub>4</sub> @CoNiS  <br>NOPC | 3 M KOH                                                          | 0-1.6  | 400   | 46.95          | 95.6% (20000<br>cycles) | 9  |
| 10. | CuO  AC                                         | 3 M KOH                                                          | 0-1.4  | 700   | 19.7           | 96%<br>(3000 cycles)    | 10 |
| 11. | NiS  AC                                         | 3 M KOH                                                          | 0-1.8  | 900   | 31             | 100%<br>(1000 cycles)   | 11 |
| 12. | MnO <sub>2</sub>   Graphen<br>e hydrogel        | 0.1 M<br>Na <sub>2</sub> SO <sub>4</sub>                         | 0-2    | 1000  | 23.2           | 83.4%<br>(5000 cycles)  | 12 |
| 13. | CNTG-40  MG-<br>50                              | PAAK/KCl                                                         | 0-1.8  | 9000  | 32.7<br>(22.9) | 86%<br>(10000 cycles)   | 13 |
| 14. | AC  δ-<br>ACEP@MnO <sub>2</sub>                 | 1 M Na <sub>2</sub> SO <sub>4</sub>                              | 0-2    | 500   | 31             | 92.8%<br>(5000 cycles)  | 14 |
| 15. | MnO <sub>2</sub> /GPCN-<br>SS  GPCN-SS          | 1 M Na <sub>2</sub> SO <sub>4</sub>                              | 0-2    | 516   | 50.2           | 99.1%<br>(10000 cycles) | 15 |
| 16. | NCS-650  AC                                     | 6 M KOH                                                          | 0-1.2  | 331   | 10.3           | 88%<br>(5000 cycles)    | 16 |
| 17. | NiCoP<br>nanoplates  <br>graphene films         | 1 M KOH +<br>Porous<br>polymer<br>membrane<br>(Celgrade<br>3501) | 0-1.5  | 1301  | 32.9           | 83.1 %<br>(5000 cycles) | 17 |
| 18. | CF-200  <br>LRGONR                              | PVA/KOH                                                          | 0-1.6  | 727.8 | 33.5           | 95.8%<br>(5000 cycles)  | 18 |
| 19. | L-CoFe <sub>2</sub> O <sub>4</sub> /C<br>  AC   | 2 M KOH                                                          | 0-1.6  | 720   | 14.38          | 76.6<br>(800 cycles)    | 19 |
| 20. | CoFe <sub>2</sub> O <sub>4</sub> /CNT  <br>AC   | 2 M KOH                                                          | 0-1.6  | 400   | 30.4           | 85.6%<br>(1000 cycles)  | 20 |

|     |                                                                                     |                                                                       |       |       |       |                        |                      |
|-----|-------------------------------------------------------------------------------------|-----------------------------------------------------------------------|-------|-------|-------|------------------------|----------------------|
| 21. | NFO/GNSs-10<br>  AC                                                                 | 6 M KOH                                                               | 0-1.5 | 70    | 14.01 | 140%<br>(5000 cycles)  | 21                   |
| 22. | CC/ZnO@C@<br>NiO  graphene                                                          | 3 M KOH +<br>PVA                                                      | 0-1.4 | 380.9 | 35.7  | 87%<br>(10000 cycles)  | 22                   |
| 23. | 80MnFe <sub>2</sub> O <sub>4</sub> -<br>20rGO  rGO                                  | 3 M KOH +<br>0.1 M<br>K <sub>4</sub> [Fe(CN) <sub>6</sub> ]           | 0-1.5 | 750   | 27.7  | 95%<br>(4000 cycles)   | 23                   |
| 24. | (Ag <sub>0.50</sub> Ni <sub>0.50</sub> ) <sub>90</sub> -<br>rGO <sub>10</sub>   rGO | 3 M KOH                                                               | 0-1.7 | 1700  | 49    | 97%<br>(5000 cycles)   | 24                   |
| 25  | CuFe <sub>2</sub> O <sub>4</sub> -<br>rGO  rGO                                      | 3 M KOH +<br>0.1 M<br>K <sub>4</sub> [Fe(CN) <sub>6</sub> ]<br>in PVA | 0-1.3 | 2600  | 38    | 97%<br>(10,000 cycles) | 25                   |
| 26  | (CoNiD) <sub>60</sub> -<br>rGO <sub>40</sub>   rGO                                  | 3 M KOH +<br>0.1 M<br>K <sub>4</sub> [Fe(CN) <sub>6</sub> ]<br>in PVA | 0-1.6 | 2000  | 52.8  | 95%<br>(4000 cycles)   | 26                   |
| 27. | 80CF <sub>hs</sub> -<br>20rGO <sub>sp</sub>   rGO <sub>sp</sub>                     | 3 M KOH +<br>0.1 M<br>K <sub>4</sub> [Fe(CN) <sub>6</sub> ]<br>in PVA | 0-1.5 | 1500  | 65.8  | 96%<br>(5000 cycles)   | <b>This<br/>Work</b> |

## References

1. Zheng, L.; Guan, L.; Yang, G.; Chen, S.; Zheng, H. One-pot synthesis of CoFe<sub>2</sub>O<sub>4</sub>/rGO hybrid hydrogels with 3D networks for high capacity electrochemical energy storage devices. *RSC Adv.* **2018**, *8*, 8607-8614.
2. Sankar, K. V.; Selvan, R. K.; Meyrick, D. Electrochemical performances of CoFe<sub>2</sub>O<sub>4</sub> nanoparticles and a rGO based asymmetric supercapacitor. *RSC Adv.* **2015**, *5*, 99959-99967.



3. Wang, H.; Song, Y.; Ye, X.; Wang, H.; Liu, W.; Yan, L. Asymmetric supercapacitors assembled by dual spinel ferrites@graphene nanocomposites as electrodes. *ACS Appl. Energy Mater.* **2018**, *1*, 3206-3215.
4. Ren, C.; Jia, X.; Zhang, W.; Hou, D.; Xia, Z.; Huang, D.; Hu, J.; Chen, S.; Gao, S. Hierarchical Porous Integrated  $\text{Co}_{1-x}\text{S}/\text{CoFe}_2\text{O}_4@\text{rGO}$  Nanoflowers Fabricated via Temperature-Controlled In Situ Calcining Sulfurization of Multivariate  $\text{CoFe-MOF-74}@\text{rGO}$  for High-Performance Supercapacitor. *Adv. Funct. Mater.* **2020**, *30*, 2004519.
5. Song, K.; Wang, X.; Li, J.; Zhang, B.; Yang, R.; Liu, P.; Wang, J. 3D hierarchical  $\text{CoFe}_2\text{O}_4/\text{CoOOH}$  nanowire arrays on Ni-Sponge for high-performance flexible supercapacitors. *Electrochim. Acta* **2020**, *340*, 135892.
6. Lei, Z.; Zhang, J.; Zhao, X. S. Ultrathin  $\text{MnO}_2$  nanofibers grown on graphitic carbon spheres as high-performance asymmetric supercapacitor electrodes. *J. Mater. Chem.* **2012**, *22*, 153-160.
7. Ma, X.; Zhang, L.; Xu, G.; Zhang, C.; Song, H.; He, Y.; Zhang, C.; Jia, D. Facile synthesis of NiS hierarchical hollow cubes via Ni formate frameworks for high performance supercapacitors. *Chem. Eng. J.* **2017**, *320*, 22-28.
8. Yuan, C.; Zhang, L.; Hou, L.; Pang, G.; Oh, W.-C. One-step hydrothermal fabrication of strongly coupled  $\text{Co}_3\text{O}_4$  nanosheets–reduced graphene oxide for electrochemical capacitors. *RSC Adv.* **2014**, *4*, 14408-14413.
9. Yan, Y.; Ding, S.; Zhou, X.; Hu, Q.; Feng, Y.; Zheng, Q.; Lin, D.; Wei, X. Controllable preparation of core-shell  $\text{Co}_3\text{O}_4@\text{CoNiS}$  nanowires for ultra-long life asymmetric supercapacitors. *J. Alloys Compd.* **2021**, *867*, 158941.
10. Moosavifard, S. E.; El-Kady, M. F.; Rahmanifar, M. S.; Kaner, R. B.; Mousavi, M. F. Designing 3D highly ordered nanoporous CuO electrodes for high-performance asymmetric supercapacitors. *ACS Appl. Mater. Interfaces* **2015**, *7*, 4851-4860.

11. Guan, B.; Li, Y.; Yin, B.; Liu, K.; Wang, D.; Zhang, H.; Cheng, C. Synthesis of hierarchical NiS microflowers for high performance asymmetric supercapacitor. *Chem. Eng. J.* **2017**, *308*, 1165-1173.
12. Gao, H.; Xiao, F.; Ching, C. B.; Duan, H. High-performance asymmetric supercapacitor based on graphene hydrogel and nanostructured MnO<sub>2</sub>. *ACS Appl. Mater. Interfaces* **2012**, *4*, 2801-2810.
13. Gao, H.; Xiao, F.; Ching, C. B.; Duan, H. Flexible All-Solid-State Asymmetric Supercapacitors Based on Free-Standing Carbon Nanotube/Graphene and Mn<sub>3</sub>O<sub>4</sub> Nanoparticle/Graphene Paper Electrodes. *ACS Appl. Mater. Interfaces* **2012**, *4*, 7020-7026.
14. Wang, X.; Chen, S.; Li, D.; Sun, S.; Peng, Z.; Komarneni, S.; Yang, D. Direct Interfacial Growth of MnO<sub>2</sub> Nanostructure on Hierarchically Porous Carbon for High-Performance Asymmetric Supercapacitors. *ACS Sustain. Chem. Eng.* **2018**, *6*, 633-641.
15. Liu, B.; Liu, Y.; Chen, H.; Yang, M.; Li, H. MnO<sub>2</sub> Nanostructures Deposited on Graphene-Like Porous Carbon Nanosheets for High-Rate Performance and High-Energy Density Asymmetric Supercapacitors. *ACS Sustain. Chem. Eng.* **2019**, *7*, 3101-3110.
16. He, F.; Li, K.; Cong, S.; Yuan, H.; Wang, X.; Wu, B.; Zhang, R.; Chu, J.; Gong, M.; Xiong, S.; Wu, Y.; Zhou, A. Design and Synthesis of N-Doped Carbon Skeleton Assembled by Carbon Nanotubes and Graphene as a High-Performance Electrode Material for Supercapacitors. *ACS Appl. Energy Mater.* **2021**, *4*, 7731-7742.
17. Liang, H.; Xia, C.; Jiang, Q.; Gandi, A. N.; Schwingenschlögl, U.; Alshareef, H. N. Low temperature synthesis of ternary metal phosphides using plasma for asymmetric supercapacitors. *Nano Energy* **2017**, *35*, 331-340.
18. Lalwani, S.; Marichi, R. B.; Mishra, M.; Gupta, G.; Singh, G.; Sharma, R. K. Edge enriched cobalt ferrite nanorods for symmetric/asymmetric supercapacitive charge storage. *Electrochim. Acta* **2018**, *283*, 708-717.

19. Zhao, Y.; Xu, Y.; Zeng, J.; Kong, B.; Geng, X.; Li, D.; Gao, X.; Liang, K.; Xu, L.; Lian, J. Low-crystalline mesoporous CoFe<sub>2</sub>O<sub>4</sub>/C composite with oxygen vacancies for high energy density asymmetric supercapacitors. *RSC Adv.* **2017**, *7*, 55513-55522.
20. Yue, L.; Zhang, S.; Zhao, H.; Feng, Y.; Wang, M.; An, L.; Zhang, X.; Mi, J. One-pot synthesis CoFe<sub>2</sub>O<sub>4</sub>/CNTs composite for asymmetric supercapacitor electrode. *Solid State Ion.* **2019**, *329*, 15-24.
21. Gao, X.; Bi, J.; Wang, W.; Liu, H.; Chen, Y.; Hao, X.; Sun, X.; Liu, R. Morphology-controllable synthesis of NiFe<sub>2</sub>O<sub>4</sub> growing on graphene nanosheets as advanced electrode material for high performance supercapacitors. *J. Alloys Compd.* **2020**, *826*, 154088.
22. Ouyang, Y.; Xia, X.; Ye, H.; Wang, L.; Jiao, X.; Lei, W.; Hao, Q. Three-dimensional hierarchical structure ZnO@C@NiO on carbon cloth for asymmetric supercapacitor with enhanced cycle stability. *ACS Appl. Mater. Interfaces* **2018**, *10*, 3549-3561.
23. Makkar, P.; Ghosh, N. N. Facile synthesis of MnFe<sub>2</sub>O<sub>4</sub> hollow sphere-reduced graphene oxide nanocomposites as electrode materials for all-solid-state flexible high-performance asymmetric supercapacitors. *ACS Appl. Energy Mater.* **2020**, *3*, 2653-2664.
24. Makkar, P.; Ghosh, N. N., High-Performance All-Solid-State Flexible Asymmetric Supercapacitor Device Based on a Ag-Ni Nanoparticle-Decorated Reduced Graphene Oxide Nanocomposite as an Advanced Cathode Material. *Ind. Eng. Chem. Res.* **2021**, *60*, 1666-1674.
25. Makkar, P.; Gogoi, D.; Roy, D.; Ghosh, N. N. Dual-Purpose CuFe<sub>2</sub>O<sub>4</sub>-rGO-Based Nanocomposite for Asymmetric Flexible Supercapacitors and Catalytic Reduction of Nitroaromatic Derivatives. *ACS Omega* **2021**, *6*, 28718-28728.
26. Makkar, P.; Ghosh, N. N. Snowflake-Like Dendritic CoNi Alloy-rGO Nanocomposite as a Cathode Electrode Material for an All-Solid-State Flexible Asymmetric High-Performance Supercapacitor Device. *ACS Omega* **2020**, *5*, 10572-10580.
